1 **High-throughput yeast two-hybrid library screening using next generation sequencing**

2

3 Marie-Laure Erffelinck<sup>1,2</sup>, Bianca Ribeiro<sup>1,2</sup>, Maria Perassolo<sup>1,2,3,4</sup>, Laurens Pauwels<sup>1,2</sup>, Jacob

4 Pollier<sup>1,2</sup>, Veronique Storme<sup>1,2</sup> and Alain Goossens<sup>1,2\*</sup>

5

6 <sup>1</sup>Ghent University, Department of Plant Biotechnology and Bioinformatics, Technologiepark

7 927, B-9052 Ghent, Belgium

8 <sup>2</sup>VIB Center for Plant Systems Biology, Technologiepark 927, B-9052 Ghent, Belgium

9 <sup>3</sup>Universidad de Buenos Aires, Facultad de Farmacia y Bioquímica, Departamento de

10 Microbiología, Inmunología y Biotecnología, Cátedra de Biotecnología, Buenos Aires,

11 Argentina

12 <sup>4</sup>CONICET-Universidad de Buenos Aires, Instituto de Nanobiotecnología (NANOBIOTEC),

13 Buenos Aires, Argentina

14

15 \*Corresponding author

16 E-mail: [alain.goossens@psb.vib-ugent.be](mailto:alain.goossens@psb.vib-ugent.be)

17

18 ¶These authors contributed equally to this work.

19

20 **Short title: High-throughput Y2H-seq library screening**

21

22

## 23 **Abstract**

24 Yeast two-hybrid (Y2H) is a well-established genetics-based system that uses yeast to  
25 selectively display binary protein-protein interactions (PPIs). To meet the current need to  
26 unravel complex PPI networks, several adaptations have been made to establish medium- to  
27 high-throughput Y2H screening platforms, with several having successfully incorporated the  
28 use of the next-generation sequencing (NGS) technology to increase the scale and sensitivity  
29 of the method. However, these have been to date mainly restricted to the use of fully  
30 annotated custom-made open reading frame (ORF) libraries and subject to complex  
31 downstream data processing. Here, a streamlined high-throughput Y2H library screening  
32 strategy, based on integration of Y2H with NGS, called Y2H-seq, was developed, which allows  
33 efficient and reliable screening of Y2H cDNA libraries. To generate proof of concept, the  
34 method was applied to screen for interaction partners of two key components of the  
35 jasmonate signaling machinery in the model plant *Arabidopsis thaliana*, resulting in the  
36 identification of several previously reported as well as hitherto unknown interactors. Our  
37 Y2H-seq method offers a user-friendly, specific and sensitive screening method that allows  
38 high-throughput identification of PPIs without prior knowledge of the organism's ORFs,  
39 thereby extending the method to organisms of which the genome has not entirely been  
40 annotated yet. The quantitative NGS readout and the incorporation of background controls  
41 allow to increase genome coverage and ultimately dispose of recurrent false positives,  
42 thereby overcoming some of the bottlenecks of current Y2H technologies, which will further  
43 strengthen the value of the Y2H technology as a discovery platform.

## 44 **Introduction**

45 Disentangling protein-protein interaction (PPI) networks is crucial for our understanding of  
46 cellular organization and function. To achieve this, a wide range of technologies to identify  
47 PPIs has been developed over the last decade [1,2]. One of the most advanced and  
48 commonly used methods to identify PPIs *in vivo* under near-physiological conditions is  
49 affinity purification coupled to mass spectrometry (AP-MS) [3-5]. Equivalent comprehensive  
50 assays to specifically identify binary PPIs include protein domain microarrays and *in vivo*  
51 protein fragment complementation assays (PCAs) [6-10]. The principle of PCA is based on the  
52 fusion of two hypothetically interacting proteins (bait and prey) to two fragments of a  
53 reporter protein. Interaction between the bait and prey proteins results in the reassembly of  
54 the reporter protein, followed by its activation. The signal readout can be bioluminescence,  
55 fluorescence or cell survival. In the popular yeast two-hybrid (Y2H) method, the bait protein  
56 is fused to the DNA binding domain (DBD) and the prey (or prey library in the case of a  
57 comprehensive Y2H screening) is fused to the activation domain (AD) of a transcription  
58 factor (TF) [11]. Upon association of the hypothetical interactors, the TF is functionally  
59 reconstituted and drives the expression of a reporter gene that can be scored by selective  
60 growth. Typically, conventional medium-throughput Y2H library screenings are subject to  
61 laborious one-by-one clonal identification of interaction partners, but today, proteome-wide  
62 mapping of PPIs demands a high-throughput approach. This led for instance to the  
63 development of a matrix-based Y2H method that bypassed the inefficient identification by  
64 DNA sequencing [12]. Collections of bait and prey strains were automatically combined and  
65 arrayed on fixed matrix positions and PPIs were scored as visual readouts. A major drawback  
66 of this strategy is the need for pre-assembled libraries based on defined gene models and  
67 expensive robotics that are not accessible to every researcher.

68 Clonal identification of Y2H screening with DNA sequencing has a tremendous negative  
69 effect on the efficiency, cost and labor of the method. Furthermore, given the labor-penalty  
70 involved with increasing transformation titers, the clonal identification of Y2H interactions is  
71 usually not compatible with quantitative assessment of PPI abundances. Therefore, replacing  
72 the conventional Y2H screening strategy with a pool-based selection and global  
73 identification by NGS, can have three major implications: (i) cost reduction by high-capacity  
74 sequencing, (ii) higher sensitivity and (iii) quantification of the abundance of bait-specific  
75 interactions. The lab of Marc Vidal pioneered the implementation of the NGS technology for  
76 massive parallel Y2H screening in the Stitch-Seq method, mainly to map the human  
77 interactome. Herein, single amplicons, concatenating sequences of potentially interacting  
78 proteins, serve as template for NGS [13]. Nonetheless, this method remains laborious  
79 because it requires clonal isolation and several PCR rounds for PPI identification for each  
80 selected colony. The lab of Ulrich Stelzl developed the Y2H-seq method, thereby illustrating  
81 the advantage of NGS for Y2H towards scalability by mapping the protein methylation  
82 interactome [14]. In this strategy, the use of barcode indexing enables simultaneous  
83 sequencing of interacting preys of multiple separate baits in a single Illumina run. This  
84 strategy is based on mixing bait and prey pools prior mating, followed by selective growth,  
85 and deep-sequencing, but still requires a post-screen binary testing of interacting baits with  
86 each of the identified preys. The use of barcodes was further exploited in the Barcode Fusion  
87 Genetics-Yeast Two-Hybrid (BFG-Y2H) method. This matrix-Y2H strategy uses Cre-  
88 recombinase to create intracellular chimeric barcodes that are derived from protein pairs,  
89 thereby enabling immediate identification and quantification of each interaction pair  
90 through NGS [15]. Prior to screening and NGS, isolation and sequencing of each barcoded  
91 bait and prey clone are essential to associate barcodes to ORFs, which may pose a cost

92 restriction for massive screening purposes. The latter was addressed in CrY2H-seq, which  
93 introduced a Cre-recombinase interaction reporter that endorses fusion of the coding  
94 sequences of two interacting proteins, followed by NGS to identify these interactions *en*  
95 *masse* [16]. The latter method was employed to uncover the transcription factor  
96 interactome of *A. thaliana*.

97 All of the above-mentioned Y2H-NGS strategies focus on increased capacity, efficiency  
98 and sensitivity, although they may face some lack in specificity or do not fully exploit the  
99 quantification potential of NGS coupled to Y2H. Furthermore, construction of full-length ORF  
100 libraries are necessary, thereby restricting these methods to organisms of which the  
101 genomes are well annotated or to 'defined' gene models, which for instance cannot take  
102 alternative splicing, alternative start codon use or transcript processing into account.

103 Here, we discuss a user-friendly and standardized Y2H-NGS workflow ('Y2H-seq'),  
104 complementary to the matrix-Y2H approaches, which allows rapid identification of  
105 interaction partners of a bait of interest in the organism of choice without the need for  
106 expensive robotics. The Y2H-seq screening method generates a quantitative readout that,  
107 through the use of control screens, allows to eliminate false-positive PPIs to boost the  
108 specificity of the method and thereby avoiding unnecessary downstream experimental  
109 binary interaction verification. Furthermore, the method is not dependent on predefined  
110 and prefabricated ORF libraries but on cDNA libraries, and is therefore principally applicable  
111 to every organism regardless of the annotation status of its genome. The functionality of our  
112 methodology is validated here by implementing it on two well-studied members of the  
113 jasmonate (JA) signaling cascade in the model plant *Arabidopsis thaliana*, i.e. TOPLESS (TPL)  
114 and Novel Interactor of JAZ (NINJA), respectively encoded by the loci AT1G15750 and  
115 AT4G28910 [17-25].

116

## 117 **Material and methods**

### 118 **Gene Cloning**

119 All cloning was carried out by Gateway® recombination (Thermo Fisher Scientific, Waltham,  
120 MA, USA). The full-length coding sequence of *IAA17* was PCR-amplified (for primers, see S2  
121 Table) and recombined in the donor vector pDONR221. All other entry clones had previously  
122 been generated [17,26].

### 123 **Binary Y2H analysis**

124 Y2H analysis was performed as described [27] using the GAL4 system [27], in which bait and  
125 prey were fused to the GAL4-AD or GAL4-BD via cloning into pDEST™22 or pDEST™32,  
126 respectively. The *Saccharomyces cerevisiae* PJ69-4α yeast strain [28] was co-transformed  
127 with bait and prey constructs using the polyethylene glycol (PEG)/lithium acetate method.  
128 Transformants were selected on SD medium lacking Leu and Trp (Clontech, France). Three  
129 individual colonies were grown overnight in liquid cultures at 30°C and 10- or 100-fold  
130 dilutions were dropped on control (SD-Leu-Trp) and selective media (SD-Leu-Trp-His).

### 131 **Y2H screening**

132 Yeast transformation was performed as described by Cuéllar-Pérez *et al.*, (2013) [27]. The *S.*  
133 *cerevisiae* PJ69-4α yeast strain was transformed in two transformation rounds, respectively  
134 with 0.5 µg of bait plasmid DNA and 50 µg of cDNA prey library plasmid DNA using the  
135 PEG/lithium acetate method. At least 10<sup>6</sup> transformants were plated on control (SD-Leu-  
136 Trp) and selective media lacking Leu, Trp and His supplemented with 5 mM 3-AT (Sigma-  
137 Aldrich, Saint Louis, MO, USA).

### 138 **Y2H cDNA library used to perform the Y2H screening**

139 The ProQuest two-hybrid cDNA library was generated by cDNA synthesis from RNA extracted  
140 from *A. thaliana* suspension cells AT7, cloned into pEXP-AD502 vector (ProQuest), equivalent  
141 to pDEST<sup>TM</sup>22 vector (Thermo Fisher Scientific) and electroporated in the DH10B-Ton A (T1  
142 and T5 phage resistance) cells (Thermo Fisher Scientific). The average insert size was 1.1 kb  
143 and the number of primary clones was  $5.3 \times 10^6$  cfu with a 100% insert coverage.

### 144 **Sanger sequencing**

145 A minimum of ten random colonies of the Y2H screening plates were streaked out on solid  
146 SD-Leu-Trp-His selective medium with 5mM 3-AT (Sigma-Aldrich, Saint Louis, MO, USA) and  
147 incubated for 48 h at 30°C. Each streaked out colony was inoculated in liquid SD-Leu-Trp-His  
148 selective medium and incubated overnight at 30°C at 230 rpm. Subsequent yeast plasmid  
149 isolation was carried out using the Zymoprep<sup>TM</sup> Yeast Plasmid Miniprep I Kit (Zymo Research,  
150 Irvine, CA, USA) according to the manufacturer's instructions. The cDNA inserts of the prey  
151 plasmids (pDEST<sup>TM</sup>22-insert) were PCR-amplified using backbone-specific primers (S2 Table)  
152 and Sanger-sequenced.

### 153 **Semi-quantitative qPCR**

154 Colonies of the Y2H screening plates were dissolved and pooled in 10-15 mL of ultrapure  
155 water and plasmids were collected using the Zymoprep<sup>TM</sup> Yeast Plasmid Miniprep II kit  
156 (Zymo Research, Irvine, CA, USA). Prey constructs were amplified via PCR using Q5<sup>®</sup> High-  
157 Fidelity DNA Polymerase (New England Biolabs, Ipswich, MA, USA) and generic pDEST<sup>TM</sup>22  
158 primers that bind to the GAL4AD and the region flanking the attR1 site (S2 Table). The  
159 following program was used: initial denaturation (98°C, 30 s), 35 amplification cycles  
160 (denaturation 98°C, 10 s; annealing 55°C, 30 s; elongation 72°C, 2.5 min), final extension

161 (72°C, 5 min). The PCR mixture was purified using the CleanPCR kit (CleanNA, Alphen aan  
162 den Rijn, The Netherlands) and 40 ng of the purified PCR product was used for semi-  
163 quantitative qPCRs, which were carried out with a Lightcycler 480 (Roche Diagnostics,  
164 Brussels, Belgium) and the Lightcycler 480 SYBR Green I Master kit (Roche). Specific primers  
165 (S2 Table) and GoTaq® DNA polymerase (Promega, Fitchburg, WI, USA) were used for  
166 amplification of 40 ng of purified PCR product with the following program: initial  
167 denaturation (95°C, 5 min), 40 amplification cycles (denaturation 95°C, 30 s; annealing 60°C,  
168 30 s; elongation 72°C, 60 s), final extension (72°C, 5 min). As a reference, a short sequence  
169 originating from the AD of pDEST™22 was used. For the relative quantification with the  
170 reference gene, qBase was used [29].

#### 171 **NGS data processing**

172 The samples were sequenced by Illumina HiSeq 2000 125-bp paired-end reads. Data  
173 mapping and filtering were carried out through an in-house generated pipeline. To avoid  
174 sequencing artifacts such as read errors, primers, adapter and vector sequence  
175 contamination and PCR bias, a quality check was performed on the raw sequencing data. The  
176 quality control and trimming were performed with Trimmomatic [30]. Subsequently, the  
177 processed sequencing reads were mapped against the *Arabidopsis* reference genome,  
178 downloaded from TAIR (The Arabidopsis Information Resource, <http://arabidopsis.org>), by  
179 TopHat [31], which uses the Bowtie program as an alignment engine. In addition, TopHat  
180 requires SAM (Sequence Alignment/Map) tools to be installed. The cufflinks program was  
181 used to count the expression of each gene and report it as raw reads and FPKM. To  
182 determine possible interactors, following steps were taken. Genes with less than six read  
183 counts were not considered. Zero counts in the negative control sample were replaced by 1



184 to avoid division by 0. These genes were flagged to keep track of these imputations. FPKM  
185 values were calculated for each gene in both the sample and the negative control.  
186 Subsequently, the SNR was calculated for each gene as the ratio of the sample FPKM value  
187 to the negative control FPKM value. Genes with an  $SNR_{NINJA/EMPTY}$  or  $SNR_{TPL-N/EMPTY}$  higher than  
188 the arbitrary threshold of 11, were considered to be potential interaction partners of the  
189 bait gene.

190

## 191 **Results**

### 192 **Selection of baits**

193 JAs are phytohormones that regulate the plant's defense and modulate several  
194 developmental processes. The production of JAs via the oxylipin biosynthetic pathway leads  
195 to the accumulation of bioactive (+)-7-*iso*-jasmonoyl-L-isoleucine (JA-Ile). JA-Ile functions as  
196 a ligand between the F-box protein coronatine insensitive 1 (COI1) and the JA-ZIM (JAZ)  
197 repressor proteins, thereby promoting ubiquitination and subsequent proteasomal  
198 degradation of the JAZ proteins [32,33]. Together with the TIFY8, peapod (PPD) and ZIM  
199 proteins, the JAZ proteins belong to the TIFY super-family [32,34-37]. A key regulator in JA  
200 signaling in *A. thaliana* is the basic helix-loop-helix (bHLH) TF MYC2, encoded by the locus  
201 AT1G32640 [38,39]. In the absence of JA-Ile, MYC2 can physically interact with the JAZ  
202 proteins via the Jas motif, which in turn recruit the transcriptional repressor TPL and TPL-  
203 related proteins (TRPs) through the adaptor protein NINJA [17]. NINJA acts as a  
204 transcriptional repressor that harbors an intrinsic TPL-binding ETHYLENE RESPONSE FACTOR  
205 (ERF)-associated amphiphilic repression (EAR) motif mediating its activity (Fig 1) [17]. NINJA  
206 can also interact with non-JAZ TIFY proteins, demonstrating its role in processes other than  
207 JA signaling [17,34,37,40,41]. Likewise, TPL is associated with various cellular processes

208 through its capacity to interact with a compendium of diverse proteins [17-24,37]. For  
209 instance, TPL can bind to PEAPOD proteins through the adapter proteins KIX8 and KIX9 to  
210 negatively regulate meristemoid division in *A. thaliana* [37]. A role for TPL modulating  
211 brassinazole resistant 1 (BZR1)-regulated cell elongation and brassinosteroid-mediated  
212 control of shoot boundaries and root meristem development through interaction with the TF  
213 bri1-ems-suppressor 1 (BES1) has been described [22,24]. TPL can also be recruited by CC-  
214 type glutaredoxins to target TGA-dependent promoters to control development- and stress-  
215 associated processes.

216 Because various direct interactors have been described for both NINJA and TPL proteins  
217 and because these are currently still heavily investigated for potential novel roles and links  
218 with different signaling pathways and cellular processes, NINJA and TPL were chosen as ideal  
219 bait proteins to develop, establish and validate our Y2H-seq methodology. Notably, whereas  
220 we used the full-length ORF of NINJA as a bait, for TPL only the amino-terminal region (AA 1-  
221 188; TPL-N) was used as a bait because this domain contains the lissencephaly homologous  
222 (LisH) dimerization and C-terminal to LisH (CTLH) motifs, which are together required and  
223 sufficient for interaction with transcriptional repressors through their EAR motif.

224

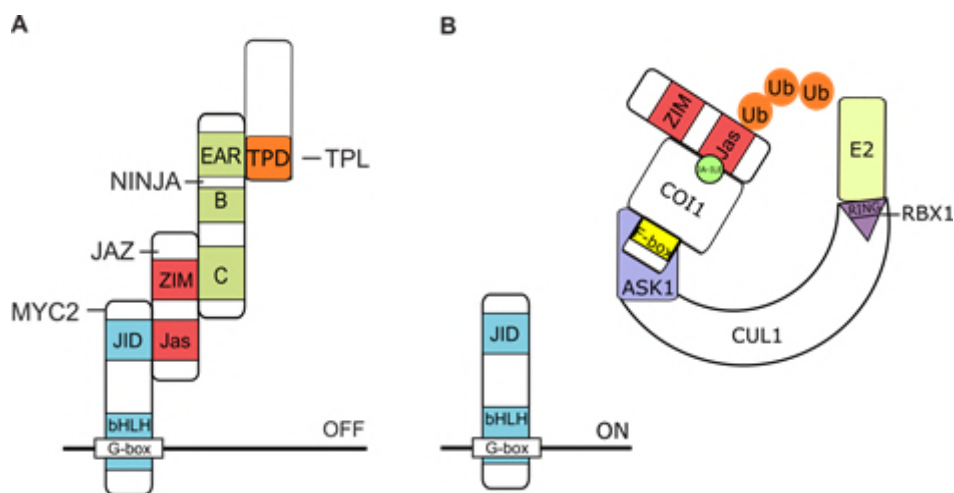

226 **Figure 1. Function of TOPLESS and NINJA in JA signaling in *A. thaliana*.** (A) In the absence of JAs,  
227 bHLH-type MYC TFs interact with the Jas domain of JAZ proteins that in turn interact with NINJA via  
228 their ZIM domain. The EAR motif of NINJA is essential for recruitment of the TPL co-repressors  
229 through the TPL domain (TPD). (B) In the presence of JA-Ile, JAZ proteins interact with the ubiquitin  
230 E3 ligase SCF<sup>CO11</sup> complex, leading to the proteasomal degradation of JAZs and consequent release of  
231 the NINJA–TPL complex from the MYC TFs, which leads to the transcriptional activation of JA-  
232 responsive genes by de-repressed MYC TFs.  
233

#### 234 **The Y2H-seq flow-chart**

235 An illustration of the general workflow of our Y2H-Seq strategy is given in Figure 2. As  
236 indicated above NINJA and TPL-N were used as baits and a Y2H cDNA library originating from  
237 *A. thaliana* AT7 suspension cells was used as prey.

238 After transformation of the Y2H reporter strain PJ69-4 $\alpha$  with the bait plasmids, a first  
239 checkpoint is introduced, in which the bait strains were individually co-transformed with  
240 positive and negative control prey expression clones to verify functional expression of the  
241 baits, to exclude possible auto-activation and to corroborate binding with previously  
242 reported interaction partners (Fig 1). Next, the bait strains were used for Y2H-seq screening  
243 with the *A. thaliana* Y2H cDNA prey library. Simultaneously, a control screening was  
244 performed with the empty expression vector, which will hereafter be referred to as EMPTY.  
245 Subsequent to five days of selective growth of the transformed yeast cells, the prey cDNA  
246 inserts of about ten individual yeast colonies per screen were Sanger-sequenced (Fig 1). This  
247 second checkpoint allowed us to confirm the retrieval of reported interactors as preys.  
248 Subsequently, all yeast colonies that survived selective growth were pooled per screen and  
249 the cDNA inserts of the prey plasmid pools were amplified by PCR. A third checkpoint  
250 consisted of a qPCR analysis with specific primers for genes corresponding to known bait  
251 interactors, which allows to assess the representation of known interactors in both screens

252 in a quantitative manner (Fig 1). Prey abundance was quantified relative to that in the *A.*  
253 *thaliana* Y2H cDNA library.

254 Upon complying the expectations of all three checkpoints, the amplicons of the pooled  
255 prey cDNA inserts were sequenced by NGS (Illumina HiSeq 2000 sequencing, 125-bp paired-  
256 end reads). The NGS-output was analyzed by an adapted RNA-Seq data processing pipeline,  
257 providing a quantitative selection of known and potentially new interactors of NINJA and  
258 TPL-N, using the EMPTY screen as control to eliminate false-positive interactions and to  
259 correct for the abundance of each prey represented by the Y2H cDNA library.

260

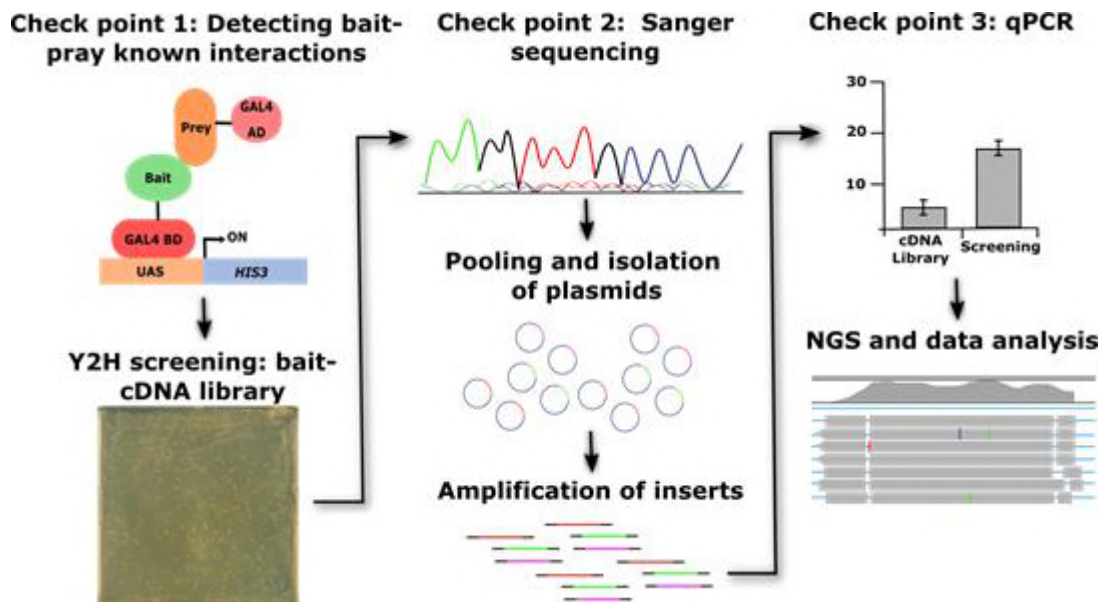

261

262 **Figure 2. Y2H-seq workflow.**

263

### 264 **Y2H-seq checkpoints**

#### 265 ***Checkpoint 1: exploring auto-activation and functionality of the bait strains***

266 The bait strains were individually co-transformed with positive and negative control preys  
267 (Fig 3 and S1 Table) to determine the level of auto-activation of the bait strain and to check

268 whether the bait protein is functionally expressed and consequently can bind previously  
269 reported interaction partners [17,25,37].

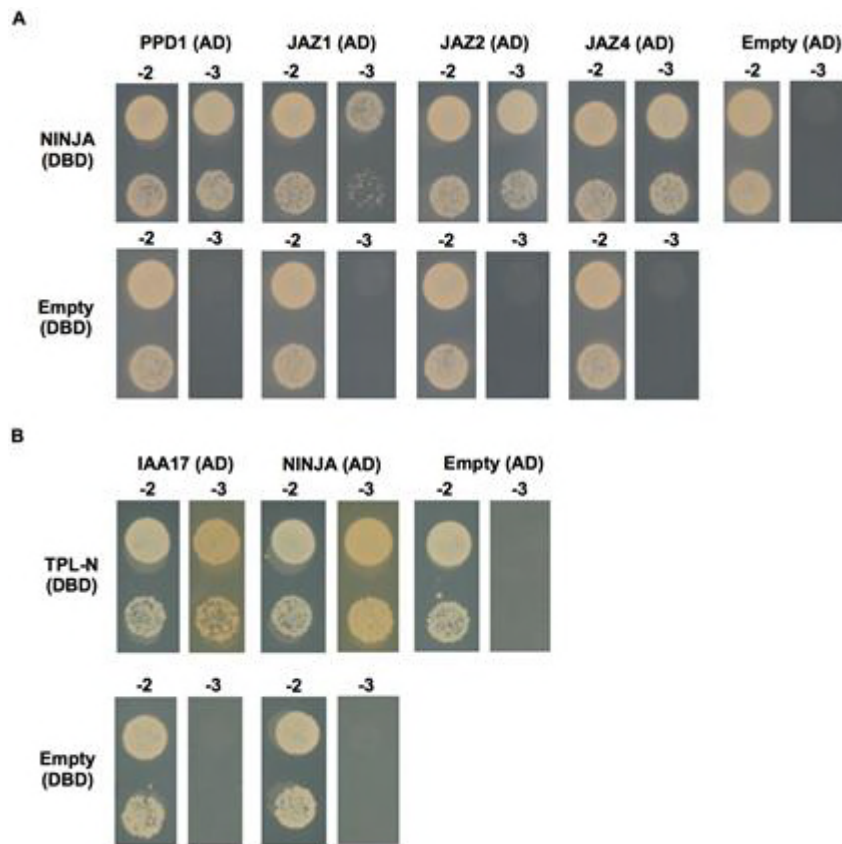

270

271 **Figure 3. Y2H of the NINJA and TPL-N bait proteins with positive and negative control prey**  
272 **proteins.** Y2H analysis of NINJA and TPL-N baits, fused to the DBD, and preys, fused to the AD, grown  
273 for 2 days on selective medium Synthetic Defined (SD)-Leu-Trp-His (-3). Transformed PJ69-4 $\alpha$  yeast  
274 strains were also grown for 2 days on SD-Leu-Trp (-2) medium to confirm growth capacity. Direct  
275 interaction was confirmed between **(A)** NINJA and PPD1, JAZ1, JAZ2 and JAZ4, and **(B)** TPL-N and  
276 auxin/indole-3-acetic acid 17 (IAA17) and NINJA.

277

278 As expected, the binary interaction between the NINJA bait and the preys PPD1, JAZ1, JAZ2  
279 and JAZ4 was confirmed (Fig 3A). Likewise, the TPL-N bait strain showed interaction with the  
280 preys auxin/indole-3-acetic acid 17 (IAA17) and NINJA (Fig 3B). Furthermore, neither of the  
281 bait strains exhibited auto-activation, which indicated that NINJA as well as TPL-N were  
282 functionally expressed in the bait strains.

283 **Checkpoint 2: Evaluation of quality of Y2H-seq screening with bait strains by Sanger**  
284 **sequencing**

285 For the actual Y2H screening, the bait strains were supertransformed with the *A. thaliana*  
286 Y2H cDNA prey library, followed by transformation efficiency assessment and five days of  
287 selective growth (Fig 4 and S1 Table). A minimum transformation efficiency of  $1 \times 10^6$   
288 screened yeast colonies should be attained for a full Y2H cDNA library screening coverage.  
289 This benchmark was achieved for all Y2H screenings we performed (Table 1).

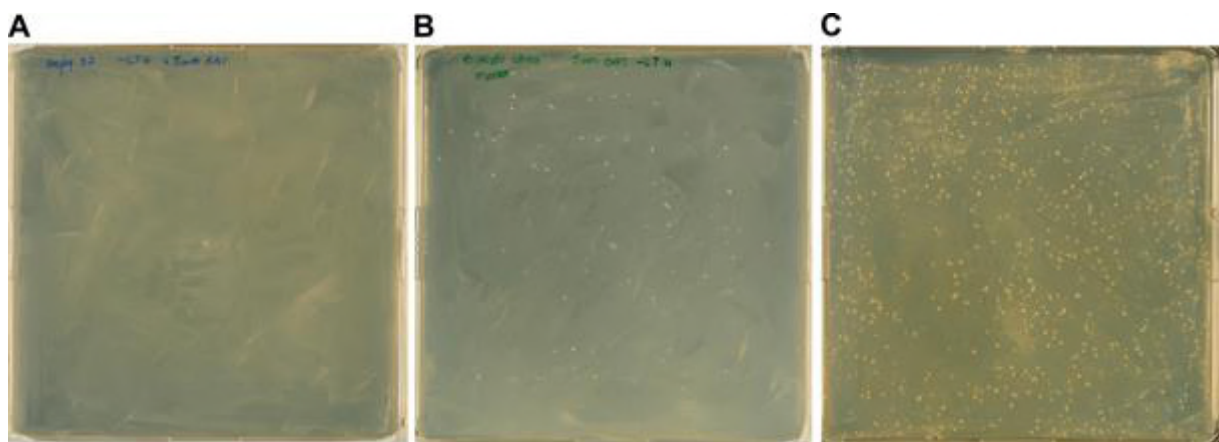

290  
291 **Figure 4. Y2H-seq selective growth.** (A-C) The EMPTY (A), NINJA (B), and TPL-N (C) Y2H-seq  
292 screenings were performed on selective SD-Leu-Trp-His + 5mM 3-AT.  
293

294 **Table 1. Transformation efficiency of Y2H screenings using EMPTY, TPL-N and NINJA as baits.** To  
295 ensure a full screening coverage of the *A. thaliana* Y2H cDNA library, screening of at least  $1 \times 10^6$   
296 yeast colonies is advised [42].

| Bait  | Transformation efficiency (# of colonies screened) |
|-------|----------------------------------------------------|
| EMPTY | $1.23 \times 10^7$                                 |
| NINJA | $3.85 \times 10^6$                                 |
| TPL-N | $2.05 \times 10^7$                                 |

297  
298 A minimum of ten individual colonies per screening were isolated, plasmids purified and the  
299 cDNA inserts of the prey plasmids Sanger-sequenced. In this second checkpoint, several  
300 known interactors could already be identified (Table 2). The ten sequences originating from  
301 the NINJA screening corresponded to two unique interaction partners that were previously

302 described as NINJA interactors [17]. Likewise, the 12 prey sequences that corresponded to  
303 potential interactors of TPL-N were derived from six different, all known interactors [18].

304

305 **Table 2. Sanger sequencing of isolated NINJA and TPL-N preys.**

| # Colonies   | Gene description                                             | Gene ID    |
|--------------|--------------------------------------------------------------|------------|
| <b>NINJA</b> |                                                              |            |
| 8            | <i>A. thaliana</i> jasmonate-ZIM-domain protein 1 (JAZ1)     | AT1G19180  |
| 1            | <i>A. thaliana</i> protein PEAPOD2 (PPD2)                    | ATt4G14720 |
| <b>TPL-N</b> |                                                              |            |
| 4            | <i>A. thaliana</i> indole-3-acetic acid inducible 2 (IAA2)   | AT3G23030  |
| 3            | <i>A. thaliana</i> indole-3-acetic acid inducible 28 (IAA28) | AT5G25890  |
| 2            | <i>A. thaliana</i> AGAMOUS-like 18 (AGL18)                   | AT3G57390  |
| 1            | <i>A. thaliana</i> indole-3-acetic acid inducible 4 (IAA4)   | AT5G43700  |
| 1            | <i>A. thaliana</i> indole-3-acetic acid inducible 30 (IAA30) | AT3G62100  |
| 1            | <i>A. thaliana</i> indole-3-acetic acid inducible 9 (IAA9)   | AT5G65670  |

306

307 **Checkpoint 3: semi-quantitative qPCR, a complementary approach to evaluate the quality**  
308 **of a Y2H-seq screening**

309 In a third checkpoint, the quality of the Y2H-seq screening was further assessed. All  
310 selectively grown yeast colonies were pooled per screening (Fig 2) and cDNA inserts of the  
311 prey plasmid pools were PCR-amplified with vector-specific primers (S2 Table). To examine  
312 whether potential interaction partners of the baits were overrepresented relative to the  
313 cDNA library control, a qPCR was performed using prey-specific qPCR primers (S2 Table). In  
314 the NINJA screen, compared to the control library, the genes encoding JAZ1, JAZ2, JAZ12,  
315 TIFY8 and PPD1 were overrepresented (Fig 5), in agreement with previous literature reports  
316 [17,34]. Hence, this shows the value of this qPCR assay set-up as a final checkpoint before  
317 the actual Y2H-seq analysis, at least for baits with a limited set of known interactors.

318 In contrast to NINJA, TPL can interact with potentially hundreds of proteins [18]. Of the  
319 EAR-motif containing proteins known to interact with TPL and identified in the second

320 checkpoint, only enrichment of IAA30 in the TPL-N pool could be observed (Fig 6, Table 2).  
321 Y2H cDNA library screenings are prone to false negatives, i.e. missing interactions, due  
322 among others to aberrant folding, clones with truncated genes or absence of the gene in the  
323 cDNA library. In the case of TPL-N, for example, the *NINJA* clone that is represented by the *A.*  
324 *thaliana* Y2H cDNA library was found to be truncated and missing the EAR domain necessary  
325 for binding with TPL-N. Therefore, critical analysis of the Y2H cDNA library content prior and  
326 post Y2H screening remains crucial to critically interpret the outcome of a Y2H screen.  
327

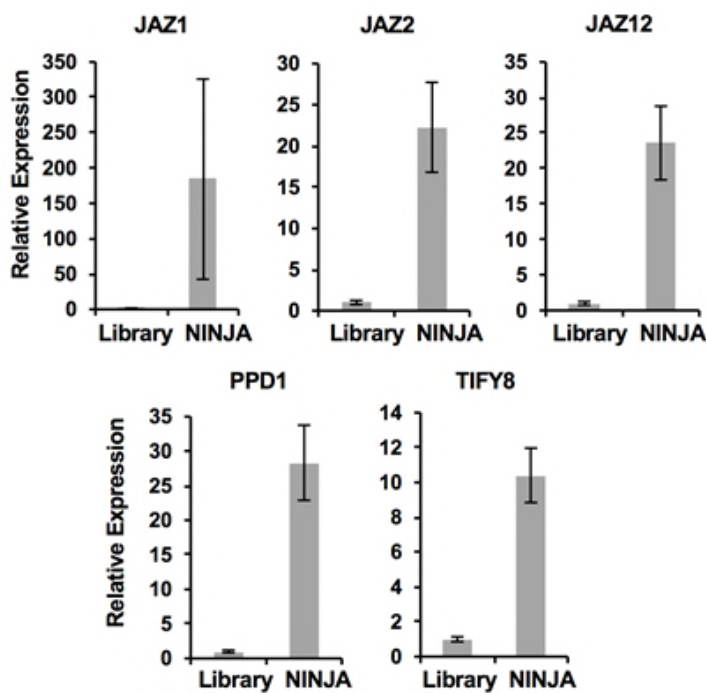

328  
329 **Figure 5. qPCR assessment of the NINJA Y2H-seq screen.** *JAZ1*, *JAZ2*, *JAZ12*, *TIFY8* and *PPD1* were  
330 overrepresented in the PCR products of the NINJA screening compared to the PCR products of the *A.*  
331 *thaliana* cDNA library (Library).  
332



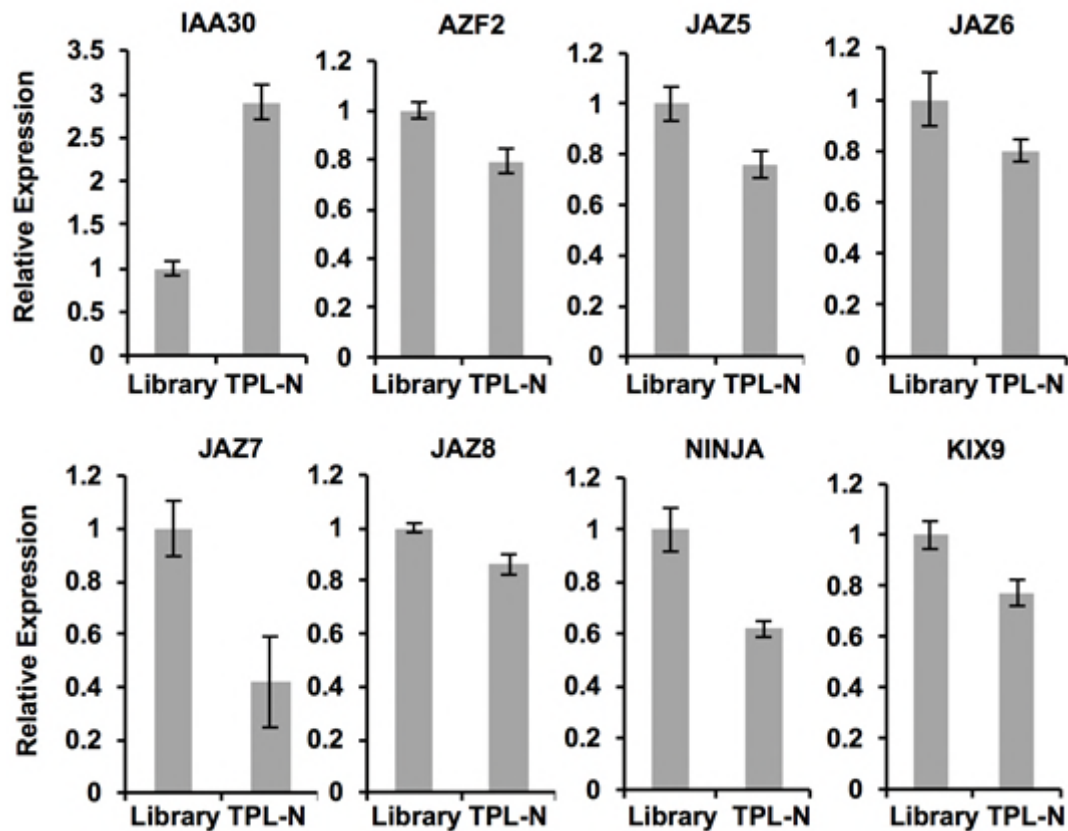

333

334 **Figure 6. qPCR assessment of the TPL-N Y2H-seq screening.** Only *IAA30* was overrepresented in the  
335 PCR products of the TPL-N screening compared to the *A. thaliana* cDNA library (Library) cDNA insert  
336 amplicons.

337

### 338 **Beyond the checkpoints: NGS of the amplified prey cDNA inserts**

339 The prey pool amplicons of the EMPTY, NINJA, and TPL-N screenings were used as input for

340 NGS by Illumina HiSeq 2000 (125-bp paired-end reads). Here, we used a pipeline relying on

341 TopHat for read mapping and Cufflinks for gene expression quantification. The method

342 presented here aims to compare the gene expression levels of the NINJA and TPL-N Y2H-seq

343 screens with the EMPTY control screen to enrich for specific interaction partners while

344 maximally avoiding the retrieval of false-positive interactions.

345 First, a quality check was performed on the raw reads. Thereby, adapters, low-quality

346 sequences and partial vector sequences were trimmed. Concomitantly, paired-end and

347 orphan single-end reads were split. The processed reads were then mapped to the reference

348 genome (TAIR10) using TopHat. To avoid overestimation of short genes, only one mate-pair  
349 per read was used for mapping. The resulting alignments were used as input for Cufflinks,  
350 which generates the raw expression quantification data for each of the analyzed raw  
351 sequencing files. For the subsequent analysis of the raw expression data, a Y2H-seq pipeline  
352 was drafted in R-studio.

353 Mapped genes in the TPL-N and NINJA Y2H screenings with raw read counts less than six  
354 were eliminated. Genes in the EMPTY screening that had no raw read counts were given an  
355 arbitrary value of 1 and flagged as imputed. After calculating the Fragments Per Kilobase of  
356 Exon Per Million Fragments Mapped (FPKM) values, the signal to noise ratio (SNR) was  
357 defined for NINJA and TPL-N compared to EMPTY. Intuitively, one would expect little NGS  
358 data to be derived from the EMPTY screening, given that no yeast cells survived selective  
359 growth (Fig 4). However, this was not the case and can be explained by the pooling method  
360 employed here: ‘scraping’ all yeast cells from the selection plates includes also dead or  
361 nearly dead cells that may still contain intact prey plasmids. Hence, genes with a high  
362 representation in the cDNA library, and thus genes with a high expression level in  
363 *Arabidopsis* suspension cells, are identified in the EMPTY NGS data set.

364 Next, to allow setting relevant arbitrary thresholds, the 99.5<sup>th</sup> percentiles of  $SNR_{NINJA/EMPTY}$   
365 and  $SNR_{TPL-N/EMPTY}$  were calculated, leading to thresholds of 7.2 for NINJA and 6.0 for TPL-N  
366 screenings, respectively (Tables 3 and 4). With this first threshold, overall, from the 71  
367 potential interactors of NINJA, seven were known to be interactors [17,34], whereas for TPL-  
368 N, 12 out of the 51 potential interactors had been previously reported [25].

369 When super-implying a second threshold, in this case of >100 on the  $FPKM_{NINJA}$  and  
370  $FPKM_{TPL-N}$  values, nearly all retained interactors were either reported already or very  
371 plausible. Indeed, in the case of NINJA, only TIFY-domain containing proteins were retained

372 (Fig 6, Table 3). In the case of TPL-N, all but one of the retained proteins using this second  
 373 threshold contained an EAR-motif [43], the conventional TPL recruitment domain (Fig 7,  
 374 Table 4), and also includes proteins not yet individually reported as TPL-interactors, but  
 375 belonging to multigene families such as the AGAMOUS-LIKE (AGL) and INDOLE-3-ACETIC  
 376 ACID INDUCIBLE (IAA) proteins, many members of which have already been reported as TPL  
 377 interactors [18,25]. Together, this demonstrates the robustness and potential of the  
 378 designed Y2H-seq platform.  
 379

380 **Table 3. Signal-to-noise ratio of the FPKM values of NINJA and EMPTY Y2H-seq screenings.** Genes  
 381 with  $SNR_{NINJA/EMPTY} > 7.2$  were retained, listed and ranked from high to low SNR. Flagged genes are  
 382 italicized. Previously reported interactors of NINJA are indicated in bold. Potential interactors that  
 383 were tested for binary interaction in further validation assays are underlined.

|                                      | Gene ID          | Gene-length | FPKM <sub>EMPTY</sub> | FPKM <sub>NINJA</sub> | SNR <sub>FPKM</sub> | Gene Alias       | Full-length | TIFY domain |
|--------------------------------------|------------------|-------------|-----------------------|-----------------------|---------------------|------------------|-------------|-------------|
| <b>FPKM<sub>NINJA</sub> &gt; 100</b> |                  |             |                       |                       |                     |                  |             |             |
| 1                                    | <b>AT3G17860</b> | 1588        | 0,731                 | 1212,639              | 1659,075            | JAI3/JAZ3/TIFY6B | Y           | Y           |
| 2                                    | <b>AT1G19180</b> | 1329        | 27,074                | 20257,141             | 748,213             | AtJAZ1/TIFY10A   | Y           | Y           |
| 3                                    | <b>AT1G74950</b> | 1280        | 4,081                 | 2569,920              | 629,798             | JAZ2/TIFY10B     |             | Y           |
| 4                                    | <b>AT5G13220</b> | 1375        | 5,065                 | 2735,323              | 540,063             | JAS1/JAZ10/TIFY9 | Y           | Y           |
| 5                                    | <b>AT4G14713</b> | 1503        | 1,544                 | 375,437               | 243,081             | PPD1/TIFY4A      | Y           | Y           |
| 6                                    | <b>AT1G17380</b> | 1133        | 1,537                 | 124,895               | 81,277              | JAZ5/TIFY11A     | Y           | Y           |
| 7                                    | <b>AT4G14720</b> | 1568        | 3,701                 | 294,079               | 79,455              | PPD2/TIFY4B      | Y           | Y           |
| <b>FPKM<sub>NINJA</sub> &lt; 100</b> |                  |             |                       |                       |                     |                  |             |             |
| 8                                    | <u>AT4G36480</u> | 2058        | 0,282                 | 28,960                | 102,697             | ATLCB1/EMB2779   |             |             |
| 9                                    | <u>AT1G34340</u> | 1833        | 0,950                 | 47,346                | 49,847              |                  |             |             |
| 10                                   | <u>AT3G06850</u> | 1730        | 1,342                 | 33,645                | 25,074              | BCE2/DIN3/LTA1   |             |             |
| 11                                   | <u>AT4G05553</u> | 336         | 1,727                 | 36,306                | 21,020              |                  | Y           |             |
| 12                                   | AT5G47810        | 1684        | 4,480                 | 64,989                | 14,506              | PFK2             | Y           |             |
| 13                                   | AT3G03680        | 3308        | 0,175                 | 2,213                 | 12,612              |                  |             |             |
| 14                                   | AT3G15760        | 843         | 0,688                 | 8,269                 | 12,011              |                  | Y           |             |
| 16                                   | AT3G02830        | 1695        | 0,342                 | 4,113                 | 12,011              | PNT1/ZFN1        | Y           |             |
| 17                                   | <u>AT2G34160</u> | 636         | 0,912                 | 10,412                | 11,411              |                  | Y           |             |
| 18                                   | AT4G17080        | 2053        | 0,283                 | 3,056                 | 10,810              |                  |             |             |
| 19                                   | AT3G06550        | 2145        | 0,271                 | 2,762                 | 10,210              | RWA2             |             |             |
| 20                                   | AT1G58150        | 276         | 2,103                 | 20,205                | 9,609               |                  | Y           |             |
| 21                                   | AT1G29890        | 1901        | 0,916                 | 8,801                 | 9,609               | RWA4             |             |             |
| 22                                   | AT2G33820        | 936         | 0,620                 | 5,958                 | 9,609               | ATMBAC1          | Y           |             |
| 23                                   | <u>AT1G73340</u> | 1711        | 0,339                 | 3,259                 | 9,609               |                  | Y           |             |
| 24                                   | AT5G67440        | 2662        | 0,218                 | 2,095                 | 9,609               | MEL2/NPY3        |             |             |
| 25                                   | AT1G32440        | 1908        | 0,304                 | 2,740                 | 9,009               | PKp3             |             |             |

|    |           |      |       |       |       |               |   |
|----|-----------|------|-------|-------|-------|---------------|---|
| 26 | AT3G49350 | 2220 | 0,261 | 2,355 | 9,009 |               |   |
| 27 | AT2G44830 | 2399 | 0,242 | 2,179 | 9,009 |               |   |
| 28 | AT5G27390 | 1040 | 1,116 | 9,719 | 8,708 |               | Y |
| 29 | AT2G30105 | 1377 | 0,421 | 3,544 | 8,408 |               |   |
| 30 | AT3G61790 | 1407 | 0,412 | 3,468 | 8,408 |               |   |
| 31 | AT4G39140 | 1600 | 0,363 | 3,050 | 8,408 |               |   |
| 32 | AT4G37880 | 1608 | 0,361 | 3,035 | 8,408 |               |   |
| 33 | AT1G26260 | 1622 | 0,358 | 3,008 | 8,408 | CIB5          |   |
| 34 | AT4G02100 | 2085 | 0,278 | 2,340 | 8,408 |               |   |
| 35 | AT5G16000 | 2323 | 0,250 | 2,101 | 8,408 | AtNIK1        |   |
| 36 | AT2G23450 | 2387 | 0,243 | 2,044 | 8,408 |               |   |
| 37 | AT3G42660 | 2862 | 0,203 | 1,705 | 8,408 |               |   |
| 38 | AT1G13370 | 648  | 0,896 | 6,992 | 7,807 |               | Y |
| 39 | AT1G66670 | 1196 | 0,485 | 3,788 | 7,807 | CLPP3/NCLPP3  | Y |
| 40 | AT2G32340 | 1256 | 0,462 | 3,607 | 7,807 |               | Y |
| 41 | AT1G10660 | 1648 | 0,352 | 2,749 | 7,807 |               |   |
| 42 | AT3G16090 | 2120 | 0,274 | 2,137 | 7,807 | AtHrd1A       |   |
| 43 | AT4G12120 | 2404 | 0,241 | 1,885 | 7,807 | ATSEC1B       |   |
| 44 | AT3G23660 | 2568 | 0,226 | 1,764 | 7,807 |               |   |
| 45 | AT1G31440 | 1870 | 0,621 | 4,660 | 7,507 |               |   |
| 46 | AT3G44716 | 592  | 0,980 | 7,065 | 7,207 |               | Y |
| 47 | AT3G60640 | 643  | 0,903 | 6,505 | 7,207 | ATG8G         | Y |
| 48 | AT2G34980 | 912  | 0,636 | 4,586 | 7,207 | SETH1         | Y |
| 49 | AT5G28330 | 974  | 0,596 | 4,294 | 7,207 |               | Y |
| 50 | AT4G25600 | 1165 | 0,498 | 3,590 | 7,207 |               |   |
| 51 | AT2G18162 | 1231 | 0,471 | 3,398 | 7,207 | CPuORF1       | Y |
| 52 | AT3G04730 | 1279 | 0,454 | 3,270 | 7,207 | IAA16         | Y |
| 53 | AT4G26070 | 1342 | 0,432 | 3,117 | 7,207 | ATMEK1/MKK1N  | Y |
| 54 | AT1G03687 | 1428 | 0,406 | 2,929 | 7,207 |               |   |
| 55 | AT1G06910 | 1528 | 0,380 | 2,737 | 7,207 | TRFL7         |   |
| 56 | AT1G52630 | 1537 | 0,378 | 2,721 | 7,207 |               | Y |
| 57 | AT1G18570 | 1654 | 0,351 | 2,529 | 7,207 | AtMYB51/BW51A |   |
| 58 | AT2G33580 | 2239 | 0,259 | 1,868 | 7,207 | LYK5          |   |
| 59 | AT5G04550 | 2580 | 0,225 | 1,621 | 7,207 |               |   |
| 60 | AT4G03560 | 2674 | 0,217 | 1,564 | 7,207 | ATCCH1/ATTPC1 |   |
| 70 | AT4G02020 | 2876 | 0,202 | 1,454 | 7,207 | EZA1/SDG10    |   |
| 71 | AT3G13690 | 3321 | 0,175 | 1,259 | 7,207 |               |   |

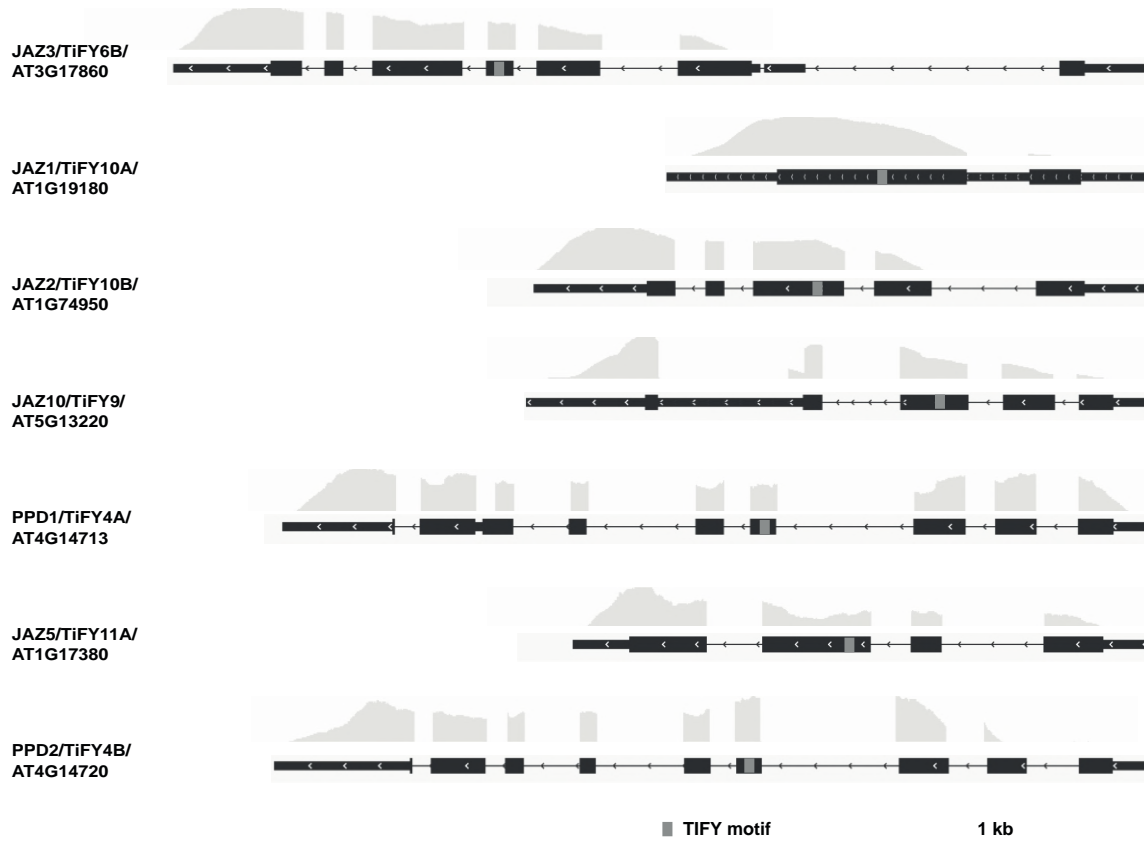

384

385

386 **Figure 6. Deepseq coverage of the NINJA interactors using cutoff of  $SNR_{NINJA/EMPTY} > 7.2$  and**  
 387  **$FPKM_{NINJA} > 100$ .** The depth of the deepseq coverage for each gene, visualized by the coverage track, is  
 388 aligned to the gene model. Coding sequences are represented by thick black boxes, 5' and 3'  
 389 untranslated regions by thin black boxes and introns by thin black lines, respectively. The light grey  
 390 boxes in the gene model correspond to the TIFY motif.

391

392 **Table 4. Signal-to-noise ratio of the FPKM values of TPL-N and EMPTY Y2H-seq screenings.** Genes  
 393 with  $SNR_{TPL-N/EMPTY} > 6$  were retained, listed and ranked from high to low SNR. Flagged genes are  
 394 italicized. Previously reported interactors of TPL are indicated in bold. Potential interactors that were  
 395 tested for binary interaction in further validation assays are underlined. A 'Y' in bold font indicates  
 396 the presence of an EAR domain in the wrong frame or in an untranslated region of the gene.

|                                           | Gene ID          | Gene-length | $FPKM_{EMPTY}$ | $FPKM_{N-TPL}$ | $SNR_{FPKM}$ | Gene Alias     | Full-length | EAR domain |
|-------------------------------------------|------------------|-------------|----------------|----------------|--------------|----------------|-------------|------------|
| <b><math>FPKM_{N-TPL} &gt; 100</math></b> |                  |             |                |                |              |                |             |            |
| 1                                         | <b>AT5G25890</b> | 873         | 11,301         | 3997,602       | 353,736      | IAA28/IAR2     | Y           | Y          |
| 2                                         | <b>AT3G23030</b> | 941         | 49,339         | 8581,581       | 173,933      | IAA2           | Y           | Y          |
| 3                                         | <b>AT5G43700</b> | 1168        | 0,994          | 111,604        | 112,307      | ATAUX2-11/IAA4 | Y           | Y          |
| 4                                         | <b>AT4G28640</b> | 1202        | 20,761         | 1121,873       | 54,037       | IAA11          | Y           | Y          |
| 5                                         | <b>AT4G29080</b> | 1337        | 4,341          | 219,498        | 50,568       | IAA27/PAP2     | Y           | Y          |
| 6                                         | <b>AT3G15540</b> | 970         | 7,180          | 266,613        | 37,135       | IAA19/MSG2     | Y           | Y          |
| 7                                         | <b>AT1G04250</b> | 1087        | 249,863        | 8692,277       | 34,788       | AXR3/IAA17     | Y           | Y          |
| 8                                         | <u>AT3G50000</u> | 1467        | 19,384         | 543,833        | 28,055       | ATCKA2         | Y           |            |

|                                    |                  |      |        |          |         |                    |   |   |
|------------------------------------|------------------|------|--------|----------|---------|--------------------|---|---|
| 9                                  | <b>AT2G33310</b> | 1820 | 64,093 | 1054,613 | 16,454  | IAA13              | Y | Y |
| 10                                 | AT2G46990        | 655  | 9,746  | 158,039  | 16,215  | IAA20              | Y | Y |
| 11                                 | <b>AT5G13790</b> | 962  | 15,685 | 198,181  | 12,635  | AGL15              | Y | Y |
| <b>FPKM<sub>N-TPL</sub>&lt;100</b> |                  |      |        |          |         |                    |   |   |
| 12                                 | <u>AT3G54390</u> | 1341 | 3,0294 | 69,6555  | 22,9933 |                    | Y |   |
| 13                                 | <b>AT4G37940</b> | 715  | 0,8117 | 15,1114  | 18,6177 | AGL21              | Y |   |
| 14                                 | <u>AT2G40260</u> | 1233 | 0,4707 | 8,1976   | 17,4165 |                    | Y |   |
| 16                                 | <u>AT3G58820</u> | 1391 | 0,4172 | 5,2619   | 12,6120 |                    |   | Y |
| 17                                 | <b>AT1G51950</b> | 1539 | 4,9022 | 56,1646  | 11,4570 | IAA18              | Y | Y |
| 18                                 | <b>AT1G04100</b> | 1254 | 1,3884 | 15,8426  | 11,4108 | IAA10              | Y | Y |
| 19                                 | <u>AT3G05670</u> | 3090 | 0,9391 | 9,2492   | 9,8493  |                    |   | Y |
| 20                                 | AT4G31620        | 1809 | 0,9624 | 9,2481   | 9,6091  |                    |   | Y |
| 21                                 | <u>AT2G33550</u> | 1194 | 8,2629 | 77,0636  | 9,3265  |                    |   | Y |
| 22                                 | AT1G08290        | 1760 | 0,3297 | 2,9705   | 9,0085  | WIP3               |   |   |
| 23                                 | <u>AT3G19860</u> | 1288 | 3,1540 | 25,7074  | 8,1506  | bHLH121            | Y |   |
| 24                                 | AT5G25160        | 959  | 1,2103 | 9,4494   | 7,8074  | ZFP3               | Y | Y |
| 25                                 | AT5G47110        | 1088 | 1,0668 | 8,3290   | 7,8074  | LIL3:2             |   |   |
| 26                                 | AT3G04730        | 1279 | 0,4537 | 3,5426   | 7,8074  | IAA16              |   | Y |
| 27                                 | AT5G04550        | 2580 | 0,2249 | 1,7562   | 7,8074  |                    |   |   |
| 28                                 | AT3G15760        | 843  | 0,6884 | 4,9614   | 7,2068  |                    | Y |   |
| 29                                 | AT1G12270        | 1949 | 0,5955 | 4,2919   | 7,2068  | Hop1               |   |   |
| 30                                 | AT3G47980        | 1097 | 0,5290 | 3,8126   | 7,2068  |                    |   | Y |
| 31                                 | AT1G02650        | 1542 | 0,3764 | 2,7124   | 7,2068  |                    |   |   |
| 32                                 | AT2G38950        | 2482 | 0,2338 | 1,6851   | 7,2068  |                    |   |   |
| 33                                 | AT3G19070        | 1041 | 1,6725 | 11,7184  | 7,0066  |                    |   | Y |
| 34                                 | AT1G28300        | 1317 | 0,8813 | 6,0868   | 6,9066  | AtLEC2             |   | Y |
| 35                                 | AT3G56250        | 669  | 0,8675 | 5,7308   | 6,6063  |                    | Y |   |
| 36                                 | <u>AT1G01030</u> | 1905 | 0,3046 | 2,0126   | 6,6063  | NGA3               |   | Y |
| 37                                 | AT1G61900        | 1913 | 0,3034 | 2,0041   | 6,6063  |                    |   | Y |
| 38                                 | AT1G79950        | 3123 | 0,1858 | 1,2276   | 6,6063  |                    |   |   |
| 39                                 | AT3G43575        | 4332 | 0,1340 | 0,8850   | 6,6063  |                    |   |   |
| 40                                 | AT5G36870        | 5616 | 0,2067 | 1,3033   | 6,3060  | ATGSL09/atgsl9     |   |   |
| 41                                 | AT2G30540        | 680  | 4,2672 | 26,6529  | 6,2459  |                    |   |   |
| 42                                 | AT2G38110        | 1845 | 4,0891 | 25,5028  | 6,2367  | ATGPAT6            |   | Y |
| 43                                 | AT2G25180        | 1980 | 3,2241 | 19,8913  | 6,1695  | ARR12/AtARR12      |   | Y |
| 44                                 | <u>AT1G53030</u> | 530  | 1,0950 | 6,5762   | 6,0057  |                    |   |   |
| 45                                 | <u>AT1G13680</u> | 1180 | 0,4918 | 2,9537   | 6,0057  |                    |   |   |
| 46                                 | <u>AT4G19540</u> | 1215 | 0,4776 | 2,8686   | 6,0057  | INDH/INDL          | Y |   |
| 47                                 | AT3G56160        | 1600 | 0,3627 | 2,1784   | 6,0057  |                    |   |   |
| 48                                 | <u>AT5G03570</u> | 1673 | 0,3469 | 2,0833   | 6,0057  | ATIREG2/FPN2       |   |   |
| 49                                 | AT3G59150        | 1866 | 0,3110 | 1,8678   | 6,0057  |                    | Y |   |
| 50                                 | <u>AT4G03560</u> | 2674 | 0,2170 | 1,3034   | 6,0057  | ATCCH1/ATTPC1/FOU2 |   |   |
| 51                                 | AT3G03680        | 3308 | 0,1754 | 1,0536   | 6,0057  |                    |   |   |

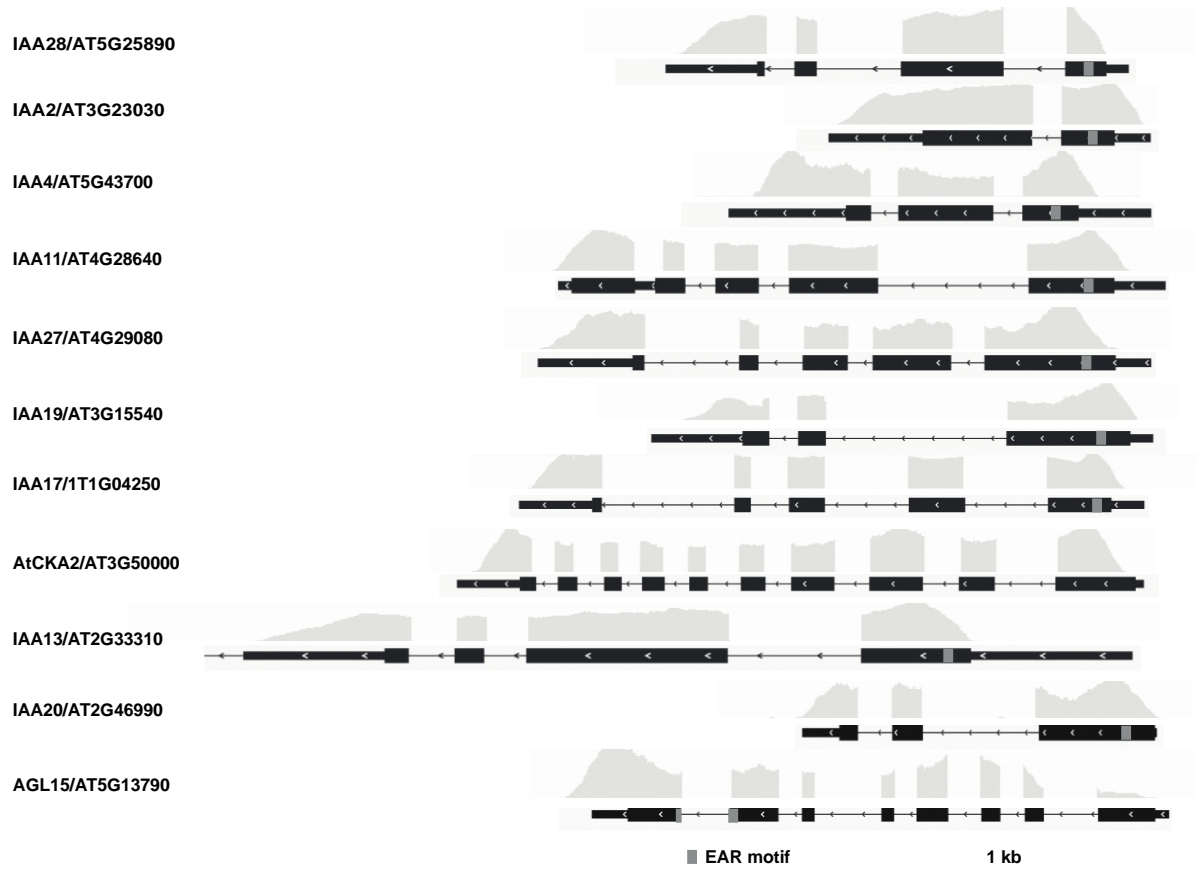

398 **Figure 7 Deepseq coverage of the N-TPL interactors using cutoff of  $SNR_{N-TPL/EMPTY} > 6$  and  $FPKM_{N-TPL} > 100$ .** The depth of the deepseq coverage for each gene, visualized by the coverage track, is aligned  
399 to the gene model. Coding sequences are represented by thick black boxes, 5' and 3' untranslated  
400 regions by thin black boxes and introns by thin black lines, respectively. The grey boxes in the gene  
401 model correspond to the EAR motif.  
402

403

404 To assess whether the retrieved preys that did not pass our stringent cut-offs, nonetheless  
405 represent true potential interactors of NINJA and N-TPL, additional Y2H experiments were  
406 carried out. For NINJA, the first four potential interaction partners with  $SNR_{NINJA/EMPTY} > 7.2$  and  
407  $FPKM_{NINJA} < 100$  were tested in a binary Y2H assay (Table 3 and Figure 8). However, none of  
408 them showed interaction with NINJA, indicating that the installed threshold of  
409  $SNR_{NINJA/EMPTY} > 7.2$  and  $FPKM_{NINJA} > 100$  served as a good selection criterion, at least for NINJA.

410

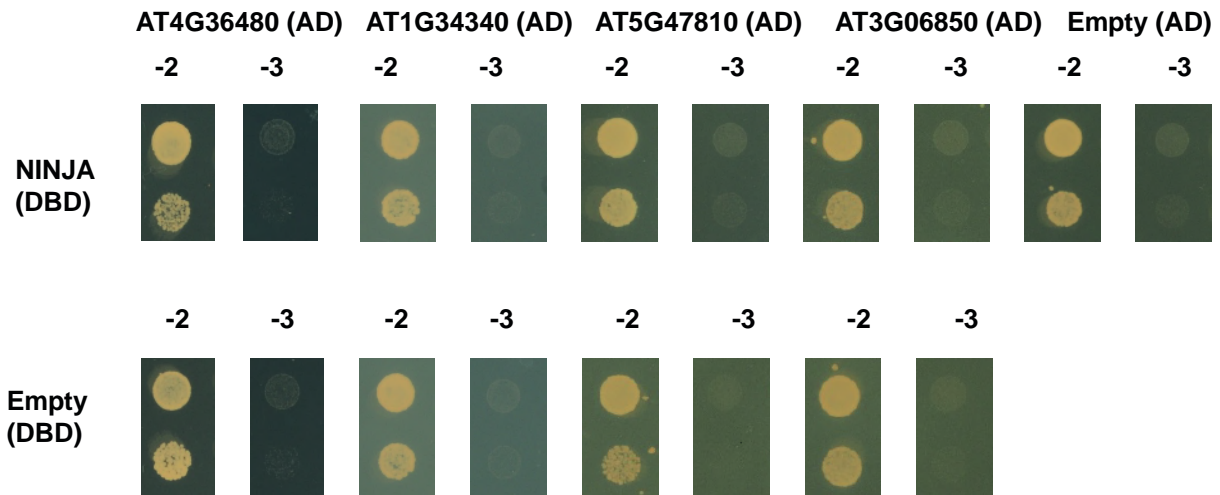

411

412 **Figure 8. Y2H analysis of potential interaction partners of NINJA.** Y2H analysis of NINJA, fused to the  
413 DBD, and potential interaction partners, fused to the AD of the GAL4 TF, grown on selective medium  
414 SD-Leu-Trp-His (-3). Transformed PJ69-4 $\alpha$  yeast strains were also grown on SD-Leu-Trp (-2) medium  
415 confirm growth capacity. No direct interactions could be observed for retrieved preys below the  
416 threshold of  $SNR_{NINJA/EMPTY} > 7.2$  and  $FPKM_{NINJA} > 100$ . Interaction between TPL and AT2G33550  
417 had previously also been detected in the TOPLESS Interactome Y2H screen [18].

418

419 In the retained list of potential interactors using threshold  $SNR_{TPL-N/EMPTY} > 6$  with  $FPKM_{N-TPL} > 100$

420 values, the one candidate ATCKA2 (AT3G50000) that did not contain an EAR-domain was

421 tested for direct interaction with N-TPL in a Y2H assay, besides five candidates with  $FPKM_{N-TPL}$

422  $< 100$  (Table 4 and Figure 9). For the latter set, we specifically avoided to pick candidates

423 from the AGL and IAA families, which are most likely true, but less abundant interactors, and

424 chose both candidates with and without an EAR domain. ATCKA2 interaction with N-TPL

425 could not be confirmed with binary Y2H, suggesting it was a false positive caused by the Y2H-

426 seq pipeline. In contrast however, interaction between TPL-N and the five other candidates

427 were all confirmed, demonstrating that they do not represent artefacts of the Y2H-seq

428 methodology and may be true interactors. Hence, in contrast to NINJA, this implicates that

429 the arbitrary threshold of  $SNR_{TPL-N/EMPTY} > 6$  with  $FPKM_{N-TPL} > 100$  was too stringent for N-TPL.

430 Perhaps this may be due to the pleiotropic function of TPL, which has an exceptionally high

431 number of protein interactors, often from multigene families. For proteins such as NINJA,



432 with a more defined role and a well-defined set of interactors, a stricter threshold may be  
433 justified. For proteins such as TPL, one may need to be more relaxed in determining  
434 candidate interactors. As exemplified here, this leads to the identification of potential novel  
435 interactors from gene families previously unreported to be capable of interacting with TPL,  
436 including EAR-domain containing proteins such as the RING/U-box protein AT3G05670, or  
437 proteins that do not contain an EAR domain such as the putative TF AT3G54390, the  
438 homeodomain TF AT2G40260 and the bHLH TF AT3G19860 (Table 4 and Figure 9).  
439

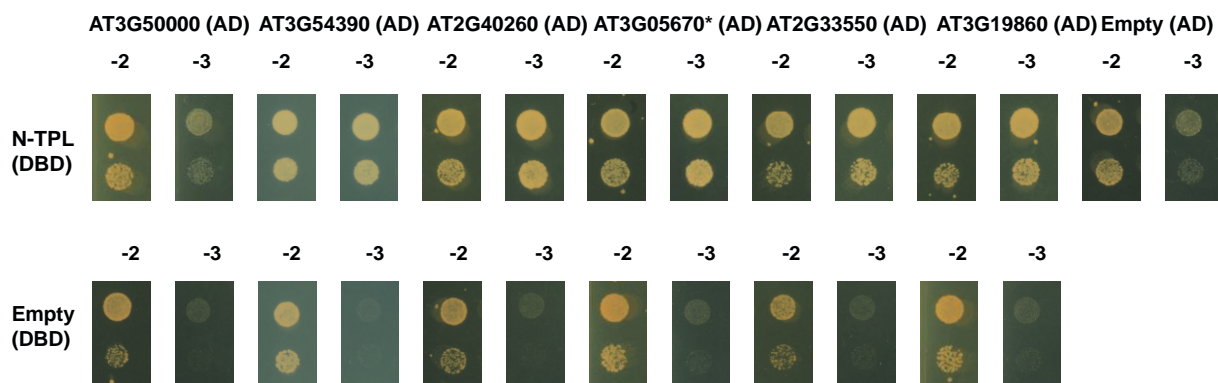

440  
441 **Figure 9. Binary Y2H validation of potential interaction partners of N-TPL.** Y2H analysis of N-TPL,  
442 fused to the DBD, and potential interaction partners, fused to the AD of the GAL4 TF, grown on  
443 selective medium SD-Leu-Trp-His (-3). Co-transformed PJ69-4 $\alpha$  yeast strains were also grown on SD-  
444 Leu-Trp (-2) medium to confirm growth capacity. No direct interaction was confirmed between  
445 ATCKA2 encoded by AT3G5000 and N-TPL, in contrast to the interactions with all other potential  
446 interactors selected from the list with a threshold of  $SNR_{NINJA/EMPTY} > 7.2$  and  $FPKM_{NINJA} < 100$  values. \*  
447 indicates a truncated version of the protein, as it was present in the Y2H cDNA library.  
448

## 449 Discussion

450 Here, we present a newly designed high-throughput Y2H-seq strategy to identify PPIs, which  
451 enables exploiting the full qualitative and quantitative potential of Y2H library screenings in  
452 an unprecedented way. Our method circumvents multiple shortcomings of a conventional  
453 Y2H library screening. As such, for instance consumable and DNA sequencing costs are  
454 significantly cut by using a pool-based NGS-strategy instead of the conventional isolation,

455 manipulation and sequencing of individual yeast clones that survive the screening selection.  
456 Moreover, a higher sensitivity can be achieved in our Y2H-seq strategy through maximal  
457 coverage of PPIs by increasing library titers. Consequently, interactions with less abundant  
458 proteins that would be masked or lost in conventional Y2H screenings can now be detected.  
459 In this regard, a factor that will determine the impact of future Y2H-seq screenings more  
460 than ever, will be the choice and the quality of the Y2H cDNA library. For instance, full-length  
461 protein libraries may mask PPIs by steric hindrance, hence the use of more complex Y2H  
462 cDNA libraries encoding protein fragments as well as full-length proteins may now be  
463 considered, and screened in one effort, which could lead to a comprehensive coverage of  
464 the PPI space. The utility of fragment-based Y2H approaches has previously been  
465 demonstrated [44,45]. By playing with sample preparations to generate cDNA libraries, one  
466 could increase the genome coverage with no extra effort in the Y2H screening. For instance,  
467 different organs from a single plant, different developmental stages of a single organ, or  
468 explants subjected to different environmental cues or chemicals can now be pooled in a  
469 single cDNA library. This will allow expanding the number of genes screened in a single  
470 event, as well as different versions of the same gene, e.g. following expression after  
471 alternative splicing or translation start events. As such, the Y2H-seq strategy will provide an  
472 effective way to discover differentially regulated PPIs, allowing further exploration of  
473 biological pathways and their regulation. Furthermore, the use of cDNA libraries makes it  
474 possible to identify novel interaction partners of organisms of which the genome has not  
475 been fully annotated yet, unlike the use of ORF libraries based on known and completely  
476 fixed gene models.

477 The Y2H-seq strategy implements a quantitative readout system, with a straightforward  
478 and adaptable scoring procedure. The use of background controls reliably allows eliminating

479 false positives in early stage. This does not only involve comparing quantitative NGS  
480 readouts from Y2H-seq screenings with bait proteins to those of control screenings with  
481 'empty' control vectors, but also comparing the readouts of the screenings with bait proteins  
482 among each other. Indeed, as is also the case with other PPI discovery methods, such as  
483 tandem affinity purification [46,47], a specific 'blacklist' of returning Y2H-seq interactors for  
484 each cDNA library can be composed by marking common interactors of seemingly unrelated  
485 bait proteins. This may allow fine-tuning the thresholds to be set up in the filtering of the  
486 Y2H-seq NGS data, and thereby enable determining robust priority lists and reducing  
487 laborious and needless downstream validation assays to a minimum.

488 Finally, this strategy can also easily be extended to Y1H screenings, for which the same  
489 cDNA library could be screened, but for which considerably higher false-positive rates are  
490 typically obtained as compared to Y2H screenings [48,49]. As such, we anticipate that the  
491 cost and labor reduction along with the increased detection and quantification potential of  
492 our Y2H-seq strategy can give an important upgrade to this long-existing, but far from fully  
493 exploited screening tool.

494

## 495 **Supporting information**

496 **S1 Table. Yeast strains generated in this study.**

497 (DOCX)

498 **S2 Table. Primers used in this study.**

499 (DOCX)

500

## 501 **Acknowledgements**

502 We thank Annick Bleys for helping to prepare the manuscript and Frederik Coppens for  
503 helpful advice on NGS. This research was supported by the Research Foundation Flanders for  
504 postdoctoral fellowships to J.P. and L.P., the Program Ciências Sem Fronteiras for a  
505 predoctoral fellowship to B.R. (Grant 201135/2014-0), the BEC.AR program for overseas  
506 training of Argentine professionals in the fields of science, technology and productive  
507 innovation for a scholarship to M.P. and the Special Research Fund from Ghent University  
508 (project O1J14813).

509

510

## 511 References

- 512 1. Stynen B, Tournu H, Tavernier J, Van Dijck P (2012) Diversity in genetic *in vivo* methods for  
513 protein-protein interaction studies: from the yeast two-hybrid system to the  
514 mammalian split-luciferase system. *Microbiol Mol Biol Rev* 76: 331-382.
- 515 2. Xing S, Wallmeroth N, Berendzen KW, Grefen C (2016) Techniques for the analysis of  
516 protein-protein interactions in vivo. *Plant Physiol* 171: 727-758.
- 517 3. Dunham WH, Mullin M, Gingras AC (2012) Affinity-purification coupled to mass  
518 spectrometry: basic principles and strategies. *Proteomics* 12: 1576-1590.
- 519 4. Bensimon A, Heck AJR, Aebersold R (2012) Mass spectrometry-based proteomics and  
520 network biology. *Annu Rev Biochem* 81: 379-405.
- 521 5. Dedecker M, Van Leene J, De Jaeger G (2015) Unravelling plant molecular machineries  
522 through affinity purification coupled to mass spectrometry. *Curr Opin Plant Biol* 24: 1-  
523 9.
- 524 6. Remy I, Michnick SW (2015) Mapping biochemical networks with protein fragment  
525 complementation assays. *Methods Mol Biol* 1278: 467-481.
- 526 7. Kaushansky A, Allen JE, Gordus A, Stiffler MA, Karp ES, et al. (2010) Quantifying protein-  
527 protein interactions in high throughput using protein domain microarrays. *Nat Protoc*  
528 5: 773-790.
- 529 8. Johnsson N, Varshavsky A (1994) Split ubiquitin as a sensor of protein interactions in vivo.  
530 *Proc Natl Acad Sci USA* 91: 10340-10344.
- 531 9. Kittanakom S, Chuk M, Wong V, Snyder J, Edmonds D, et al. (2009) Analysis of membrane  
532 protein complexes using the split-ubiquitin membrane yeast two-hybrid system.  
533 *Methods Mol Biol* 548: 247-271.
- 534 10. Müller J, Johnsson N (2008) Split-ubiquitin and the split-protein sensors: chessman for the  
535 endgame. *ChemBioChem* 9: 2029-2038.
- 536 11. Fields S, Song O-k (1989) A novel genetic system to detect protein-protein interactions.  
537 *Nature* 340: 245-246.
- 538 12. Häuser R, Stellberger T, Rajagopala SV, Uetz P (2012) Matrix-based yeast two-hybrid screen  
539 strategies and comparison of systems. *Methods Mol Biol* 812: 1-20.
- 540 13. Yu H, Tardivo L, Tam S, Weiner E, Gebreab F, et al. (2011) Next-generation sequencing to  
541 generate interactome datasets. *Nat Methods* 8: 478-480.
- 542 14. Weimann M, Grossmann A, Woodsmith J, Özkan Z, Birth P, et al. (2013) A Y2H-seq  
543 approach defines the human protein methyltransferase interactome. *Nat Methods* 10:  
544 339-342.

- 545 15. Yachie N, Petsalaki E, Mellor JC, Weile J, Jacob Y, et al. (2016) Pooled-matrix protein  
546 interaction screens using Barcode Fusion Genetics. *Mol Syst Biol* 12: 863.
- 547 16. Trigg SA, Garza RM, MacWilliams A, Nery JR, Bartlett A, et al. (2017) CrY2H-seq: a massively  
548 multiplexed assay for deep-coverage interactome mapping. *Nat Methods* 14: 819-825.
- 549 17. Pauwels L, Barbero GF, Geerinck J, Tilleman S, Grunewald W, et al. (2010) NINJA connects  
550 the co-repressor TOPLESS to jasmonate signalling. *Nature* 464: 788-791.
- 551 18. Causier B, Ashworth M, Guo W, Davies B (2012) The TOPLESS interactome: a framework  
552 for gene repression in *Arabidopsis*. *Plant Physiol* 158: 423-438.
- 553 19. Lynch TJ, Erickson BJ, Miller DR, Finkelstein RR (2017) ABI5-binding proteins (AFPs) alter  
554 transcription of ABA-induced genes via a variety of interactions with chromatin  
555 modifiers. *Plant Mol Biol* 93: 403-418.
- 556 20. Uhrig JF, Huang L-J, Barghahn S, Willmer M, Thurow C, et al. (2017) CC-type glutaredoxins  
557 recruit the transcriptional co-repressor TOPLESS to TGA-dependent target promoters  
558 in *Arabidopsis thaliana*. *Biochim Biophys Acta - Gene Regul Mech* 1860: 218-226.
- 559 21. Goralogia GS, Liu Tk, Zhao L, Panipinto PM, Groover ED, et al. (2017) CYCLING DOF FACTOR  
560 1 represses transcription through the TOPLESS co-repressor to control photoperiodic  
561 flowering in *Arabidopsis*. *Plant J* 92: 244-262.
- 562 22. Espinosa-Ruiz A, Martínez C, de Lucas M, Fàbregas N, Bosch N, et al. (2017) TOPLESS  
563 mediates brassinosteroid control of shoot boundaries and root meristem development  
564 in *Arabidopsis thaliana*. *Development* 144: 1619-1628.
- 565 23. Graeff M, Straub D, Eguen T, Dolde U, Rodrigues V, et al. (2016) MicroProtein-mediated  
566 recruitment of CONSTANS into a TOPLESS trimeric complex represses flowering in  
567 *Arabidopsis*. *PLoS Genet* 12: e1005959.
- 568 24. Oh E, Zhu J-Y, Ryu H, Hwang I, Wang Z-Y (2014) TOPLESS mediates brassinosteroid-induced  
569 transcriptional repression through interaction with BZR1. *Nat Commun* 5: 4140.
- 570 25. Szemenyei H, Hannon M, Long JA (2008) TOPLESS mediates auxin-dependent  
571 transcriptional repression during *Arabidopsis* embryogenesis. *Science* 319: 1384-1386.
- 572 26. Nagels Durand A, Moses T, De Clercq R, Goossens A, Pauwels L (2012) A MultiSite  
573 Gateway™ vector set for the functional analysis of genes in the model *Saccharomyces*  
574 *cerevisiae*. *BMC Mol Biol* 13: 30.
- 575 27. Cuéllar Pérez A, Pauwels L, De Clercq R, Goossens A (2013) Yeast two-hybrid analysis of  
576 jasmonate signaling proteins. *Methods Mol Biol* 1011: 173-185.
- 577 28. James P, Halladay J, Craig EA (1996) Genomic libraries and a host strain designed for highly  
578 efficient two-hybrid selection in yeast. *Genetics* 144: 1425-1436.

- 579 29. Hellemans J, Mortier G, De Paepe A, Speleman F, Vandesompele J (2007) qBase relative  
580 quantification framework and software for management and automated analysis of  
581 real-time quantitative PCR data. *Genome Biol* 8: R19.
- 582 30. Bolger AM, Lohse M, Usadel B (2014) Trimmomatic: a flexible trimmer for Illumina  
583 sequence data. *Bioinformatics* 30: 2114-2120.
- 584 31. Gnimpieba EZ (2013) RNA-Seq workflow with TopHat and Cufflinks using Bioextract Server.  
585 Available at: <http://www.myexperiment.org/workflows/3895.html?version=1>.
- 586 32. Chini A, Gimenez-Ibanez S, Goossens A, Solano R (2016) Redundancy and specificity in  
587 jasmonate signalling. *Curr Opin Plant Biol* 33: 147-156.
- 588 33. Goossens J, Fernández-Calvo P, Schweizer F, Goossens A (2016) Jasmonates: signal  
589 transduction components and their roles in environmental stress responses. *Plant Mol*  
590 *Biol* 91: 673-689.
- 591 34. Cuéllar Pérez A, Nagels Durand A, Vanden Bossche R, De Clercq R, Persiau G, et al. (2014)  
592 The non-JAZ TIFY protein TIFY8 from *Arabidopsis thaliana* is a transcriptional repressor.  
593 *PLoS ONE* 9: e84891.
- 594 35. Chico JM, Chini A, Fonseca S, Solano R (2008) JAZ repressors set the rhythm in jasmonate  
595 signaling. *Curr Opin Plant Biol* 11: 486-494.
- 596 36. Vanholme B, Grunewald W, Bateman A, Kohchi T, Gheysen G (2007) The tify family  
597 previously known as ZIM. *Trends Plant Sci* 12: 239-244.
- 598 37. Gonzalez N, Pauwels L, Baekelandt A, De Milde L, Van Leene J, et al. (2015) A repressor  
599 protein complex regulates leaf growth in *Arabidopsis*. *Plant Cell* 27: 2273-2287.
- 600 38. Kazan K, Manners JM (2013) MYC2: the master in action. *Mol Plant* 6: 686-703.
- 601 39. Goossens J, Swinnen G, Vanden Bossche R, Pauwels L, Goossens A (2015) Change of a  
602 conserved amino acid in the MYC2 and MYC3 transcription factors leads to release of  
603 JAZ repression and increased activity. *New Phytol* 206: 1229-1237.
- 604 40. Gasperini D, Chételat A, Acosta IF, Goossens J, Pauwels L, et al. (2015) Multilayered  
605 organization of jasmonate signalling in the regulation of root growth. *PLoS Genet* 11:  
606 e1005300.
- 607 41. Acosta IF, Gasperini D, Chételat A, Stolz S, Santuari L, et al. (2013) Role of NINJA in root  
608 jasmonate signaling. *Proc Natl Acad Sci USA* 110: 15473-15478.
- 609 42. Gietz RD (2014) Yeast transformation by the LiAc/SS carrier DNA/PEG method. *Methods*  
610 *Mol Biol* 1163: 33-44.
- 611 43. Kazan K (2006) Negative regulation of defence and stress genes by EAR-motif-containing  
612 repressors. *Trends Plant Sci* 11: 109-112.

- 613 44. Boxem M, Maliga Z, Klitgord N, Li N, Lemmens I, et al. (2008) A protein domain-based  
614 interactome network for *C. elegans* early embryogenesis. *Cell* 134: 534-545.
- 615 45. Waaijers S, Koorman T, Kerver J, Boxem M (2013) Identification of human protein  
616 interaction domains using an ORFeome-based yeast two-hybrid fragment library. *J*  
617 *Proteome Res* 12: 3181-3192.
- 618 46. Van Leene J, Eeckhout D, Cannoot B, De Winne N, Persiau G, et al. (2015) An improved  
619 toolbox to unravel the plant cellular machinery by tandem affinity purification of  
620 *Arabidopsis* protein complexes. *Nat Protoc* 10: 169-187.
- 621 47. Goossens J, De Geyter N, Walton A, Eeckhout D, Mertens J, et al. (2016) Isolation of protein  
622 complexes from the model legume *Medicago truncatula* by tandem affinity  
623 purification in hairy root cultures. *Plant J* 88: 476-489.
- 624 48. Li JJ, Herskowitz I (1993) Isolation of ORC6, a component of the yeast origin recognition  
625 complex by a one-hybrid system. *Science* 262: 1870-1874.
- 626 49. Wang MM, Reed RR (1993) Molecular cloning of the olfactory neuronal transcription factor  
627 Olf-1 by genetic selection in yeast. *Nature* 364: 121-126.



628 **Supporting information**

629 **S1 Table. Yeast strains generated in this study.**

| Strains generated for binary Y2H assays         |
|-------------------------------------------------|
| PJ69-4 $\alpha$ ; pDEST32[TPL-N];pDEST22[IAA17] |
| PJ69-4 $\alpha$ ; pDEST32[TPL-N];pDEST22[NINJA] |
| PJ69-4 $\alpha$ ; pDEST32[TPL-N];pDEST22[EMPTY] |
| PJ69-4 $\alpha$ ; pDEST32[NINJA];pDEST22[PPD1]  |
| PJ69-4 $\alpha$ ; pDEST32[NINJA];pDEST22[JAZ1]  |
| PJ69-4 $\alpha$ ; pDEST32[NINJA];pDEST22[JAZ2]  |
| PJ69-4 $\alpha$ ; pDEST32[NINJA];pDEST22[JAZ4]  |
| PJ69-4 $\alpha$ ; pDEST32[NINJA];pDEST22[EMPTY] |
| Strains generated for Y2H-seq screening         |
| PJ69-4 $\alpha$ ; pDEST32[TPL-N]                |
| PJ69-4 $\alpha$ ; pDEST32[NINJA]                |
| PJ69-4 $\alpha$ ; pDEST32[EMPTY]                |

630

631 **S2 Table. Primers used in this study.**

| Description                         | Sequence                                     |
|-------------------------------------|----------------------------------------------|
| IAA17 (AT1G04250) cloning primer Fw | 5'- AAAAAAGCAGGCTCCATGATGGGCAGTGTCTCGAGCT-3' |
| IAA17 (AT1G04250) cloning primer Rv | 5'-AGAAAGCTGGGTCTCMAGCTCTGCTCTTGCACTTCT-3'   |
| JAZ1 (AT1G19180) qPCR primer Fw     | 5'- TTCTGAGTTCGTCGGTAGCC -3'                 |
| JAZ1 (AT1G19180) qPCR primer Rv     | 5'- CACGTCTGTGAGAAGCTAGGC -3'                |
| JAZ2 (AT1G74950) qPCR primer Fw     | 5'- CTCTTAGCCTGCGAACTCC -3'                  |

|                                    |                                |
|------------------------------------|--------------------------------|
| JAZ2 (AT1G74950) qPCR primer Rv    | 5'- TTGGTATGGTGCCTTTGATG -3'   |
| JAZ5 (AT1G17380) qPCR primer Fw    | 5'- AAAGATGTTGCTGACCTCAGTG -3' |
| JAZ5 (AT1G17380) qPCR primer Rv    | 5'- CCCTCCGAAGAATATGGTCA -3'   |
| JAZ6 (AT1G72450) qPCR primer Fw    | 5'- TTCATCGATTCTTTGCTAAACG -3' |
| JAZ6 (AT1G72450) qPCR primer Rv    | 5'- ATCGATGGAGCAACCATCTC -3'   |
| JAZ7 (AT2G34600) qPCR primer Fw    | 5'-ATGCGACTTGGAACCTTCGCCTT-3'  |
| JAZ7 (AT2G34600) qPCR primer Rv    | 5'-AGAGCTGCTTGATTTCGTCCAACG-3' |
| JAZ8 (AT1G30135) qPCR primer Fw    | 5'-CGATCGCAAGCAGAGAAATG-3'     |
| JAZ8 (AT1G30135) qPCR primer Rv    | 5'-GATCCGACCCGTTTGAGGAT-3'     |
| JAZ12 (AT5G20900) qPCR primer Fw   | 5'- CATCTAATGTGGCATCACCAG -3'  |
| JAZ12 (AT5G20900) qPCR primer Rv   | 5'- TGCCTCCTTGCAATAGGTAGA -3'  |
| NINJA (AT4G28910) qPCR primer Fw   | 5'-AAGTGATTCCGGTCAACAGC-3'     |
| NINJA (AT4G28910) qPCR primer Rv   | 5'-GGTTGGAAGAAGAACCACCA-3'     |
| PEAPOD1 (AT4G14713) qPCR primer Fw | 5'-AAAGATGGCCACAAGACGAC-3'     |
| PEAPOD1 (AT4G14713) qPCR primer Rv | 5'-GGACACTTTTTGGCCTTTGA-3'     |
| AZF2 (AT3G19580) qPCR primer Fw    | 5'-ATTCAACAGCTCCGACCATC-3'     |
| AZF2 (AT3G19580) qPCR primer Rv    | 5'-GGCTCCTTCTCCGATACC-3'       |
| KIX9 (AT4G32295) qPCR primer Fw    | 5'-ATCATGTATTCCAAAGCCAATTC-3'  |
| KIX9 (AT4G32295) qPCR primer Rv    | 5'-CGGTCTAAAAGGGTCTTCATGT-3'   |
| TIFY8 (AT4G32570) qPCR primer Fw   | 5'-CGTCTCCGACAGACAGAACA-3'     |
| TIFY8 (AT4G32570) qPCR primer Rv   | 5'-CCTGAAAACCGATTGCTCAT-3'     |
| IAA30 (AT3G62100) qPCR primer Fw   | 5'-TTCAATGCTTCAATCCTTTGG-3'    |
| IAA30 (AT3G62100) qPCR primer Rv   | 5'-AGCACGTGACTCTTCTCACTACA-3'  |
| GAL4AD pDEST22 Rv                  | 5'-GGTTTGGTGGGGTATCTTCA-3'     |
| pDEST22 Fw Sanger sequencing       | 5'-TATAACGCGTTTGAATCACT-3'     |

pDEST22 Rv Sanger sequencing

5'-AGCCGACAACCTTGATTGGAGAC-3'

632

633

634

635
